# Supplementary material for: Acid catalyst screening for hydrolysis of post-consumer PET waste and exploration of acidolysis
Source: Royal Society of Chemistry journal article supplement (doi:10.1039/d3gc03906d), 2024-01-01
Supplement: d3gc03906d1.pdf [file d3gc03906d1.pdf]

1

SUPPLEMENTARY INFORMATION

2

**Acid catalyst screening for hydrolysis of post-consumer PET  
waste and exploration of acidolysis**

3

4

**Patrícia Pereira <sup>a</sup>, Phillip E. Savage <sup>a</sup>, Christian W. Pester <sup>a, b</sup>**

5

*<sup>a</sup> Department of Chemical Engineering, The Pennsylvania State University, University Park, PA 16802,  
United States*

6

7

*<sup>b</sup> Department of Chemistry and Department of Materials Science and Engineering, The Pennsylvania  
State University, University Park, Pennsylvania 16802, United States*

8

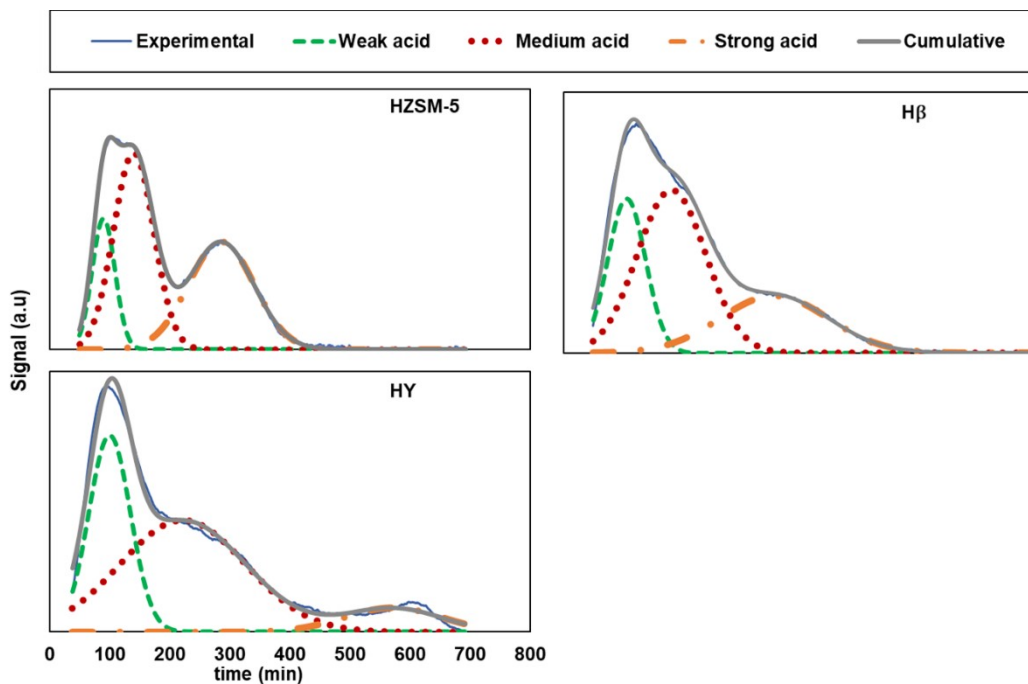

9

10 **Figure S1.** Peak deconvolution for weak, medium, and strong acid sites from  $\text{NH}_3$ -TDP of HZSM-5,  
 11 H $\beta$ , and HY.

12

13 **Table S1.** TPD peak temperatures and areas corresponding to weak, medium, and strong acid  
 14 sites by deconvolution of  $\text{NH}_3$ -TPD experimental data for the zeolite catalysts.

|           | $T$ ( $^{\circ}\text{C}$ ) |             |             | Peak area (a.u.) |             |             |
|-----------|----------------------------|-------------|-------------|------------------|-------------|-------------|
|           | Weak acid                  | Medium acid | Strong acid | Weak acid        | Medium acid | Strong acid |
| HZSM-5    | 90                         | 139         | 285         | 2.43             | 5.59        | 4.66        |
| H $\beta$ | 79                         | 136         | 265         | 3.38             | 5.57        | 2.91        |
| HY        | 99                         | 222         | 572         | 3.08             | 4.64        | 0.67        |

16 **Table S2.** Catalyst and water loadings for PET hydrolysis experiments.

| Results in Figure | Catalyst              | $T$ ( $^{\circ}\text{C}$ ) | $pH$ at room temperature | Catalyst loading | Water loading (mL) |
|-------------------|-----------------------|----------------------------|--------------------------|------------------|--------------------|
| 1                 | None                  | 200                        | (-)                      | 0.0 mg           | 3.29               |
|                   |                       | 270                        | (-)                      | 0.0 mg           | 2.92               |
|                   | HY, HZSM-5, H $\beta$ | 200                        | (-)                      | 65.7 mg          | 3.29               |
|                   |                       | 270                        | (-)                      | 58.3 mg          | 2.92               |
| 2<br>S4<br>S7     | Sulfuric Acid         | 200                        | 0.63                     | 0.0250 mL        | 2.07               |
|                   |                       | 200                        | 1.37                     | 0.0039 mL        | 2.07               |
|                   |                       | 200                        | 1.50                     | 0.0027 mL        | 2.07               |
|                   |                       | 200                        | 1.55                     | 0.0023 mL        | 2.07               |
|                   |                       | 200                        | 1.60                     | 0.0020 mL        | 2.07               |
|                   |                       | 200                        | 1.83                     | 0.0010 mL        | 2.07               |
|                   | IL                    | 200                        | 0.70                     | 0.3400 mL        | 2.07               |
|                   |                       | 200                        | 1.40                     | 0.0500 mL        | 2.07               |
|                   |                       | 200                        | 1.50                     | 0.0400 mL        | 2.07               |
|                   |                       | 200                        | 1.60                     | 0.0300 mL        | 2.07               |
|                   |                       | 200                        | 2.10                     | 0.0100 mL        | 2.07               |
|                   |                       | 200                        | 2.70                     | 0.0020 mL        | 2.07               |
|                   | IL-SO <sub>3</sub> H  | 200                        | 2.90                     | 0.0013 mL        | 2.07               |
|                   |                       | 200                        | 1.20                     | 1580 mg          | 2.07               |
|                   |                       | 200                        | 1.38                     | 840 mg           | 2.07               |
|                   |                       | 200                        | 1.86                     | 160 mg           | 2.07               |
|                   |                       | 200                        | 2.42                     | 20.0 mg          | 2.07               |
|                   | Nitric Acid           | 200                        | 2.91                     | 4.0 mg           | 2.07               |
|                   |                       | 200                        | 0.71                     | 0.2000 mL        | 2.07               |
|                   |                       | 200                        | 1.42                     | 0.0620 mL        | 3.29               |
|                   | 3<br>S10<br>S13       | Propanoic acid             | 200                      | 2.01             | 0.0100 mL          |
| 200               |                       |                            | 2.59                     | 0.0800 mL        | 2.07               |
| 200               |                       |                            | 2.21                     | 0.5000 mL        | 2.07               |
| Glycolic acid     |                       | 200                        | 1.94                     | 1.5000 mL        | 2.07               |
|                   |                       | 200                        | 2.10                     | 74.3 mg          | 2.07               |
|                   |                       | 200                        | 1.68                     | 472.7 mg         | 2.07               |
| Acetic acid       |                       | 200                        | 1.52                     | 945.8 mg         | 2.07               |
|                   |                       | 200                        | 2.75                     | 0.0160 mL        | 2.07               |
|                   |                       | 200                        | 2.62                     | 0.0280 mL        | 2.07               |
|                   |                       | 200                        | 2.50                     | 0.0600 mL        | 2.07               |
|                   |                       | 200                        | 1.94                     | 1.0000 mL        | 2.07               |
|                   |                       | 200                        | 1.89                     | 1.3600 mL        | 2.07               |
| Benzoic acid      |                       | 200                        | 1.84                     | 1.9600 mL        | 2.07               |
|                   |                       | 200                        | (-)                      | 65.8 mg          | 3.29               |
|                   |                       | 200                        | (-)                      | 501.1 mg         | 2.07               |

17 **Table S2 (cont.).** Catalyst and water loadings for PET hydrolysis experiments.

| Results in Figure | Catalyst       | $T$ ( $^{\circ}\text{C}$ ) | $pH$ at room temperature | Catalyst loading | Water loading (mL) |
|-------------------|----------------|----------------------------|--------------------------|------------------|--------------------|
|                   |                | 200                        | (-)                      | 1004 mg          | 2.07               |
|                   |                | 200                        | (-)                      | 1808 mg          | 2.07               |
|                   | 4-FBA          | 200                        | (-)                      | 4.8 mg           | 2.07               |
|                   |                | 200                        | (-)                      | 30.8 mg          | 2.07               |
|                   |                | 200                        | (-)                      | 311.6 mg         | 2.07               |
|                   |                | 200                        | (-)                      | 107.2 mg         | 2.07               |
|                   | TPA            | 200                        | (-)                      | 16.6 mg          | 2.07               |
|                   |                | 200                        | (-)                      | 24.8 mg          | 2.07               |
|                   |                | 200                        | (-)                      | 65.8 mg          | 3.29               |
|                   |                | 200                        | (-)                      | 40.6 mg          | 2.07               |
|                   |                | 200                        | (-)                      | 275.4 mg         | 3.29               |
|                   | Stearic acid   | 200                        | (-)                      | 7.7 mg           | 2.07               |
|                   |                | 200                        | (-)                      | 160.7 mg         | 2.07               |
|                   |                | 200                        | (-)                      | 512.5 mg         | 2.07               |
|                   |                | 200                        | (-)                      | 1323 mg          | 2.07               |
|                   | 4              | $\text{ZnI}_2$             | 200                      | 5.01             | 89.3 mg            |
| 200               |                |                            | 5.09                     | 55.7 mg          | 2.07               |
| 200               |                |                            | 5.11                     | 43.0 mg          | 2.07               |
| 200               |                |                            | 5.14                     | 36.0 mg          | 2.07               |
| 200               |                |                            | 5.27                     | 25.0 mg          | 2.07               |
| $\text{ZnSO}_4$   |                | 200                        | 4.9                      | 1050 mg          | 2.07               |
|                   |                | 200                        | 5.47                     | 60.0 mg          | 2.07               |
|                   |                | 200                        | 5.52                     | 40.0 mg          | 2.07               |
| Table S5          | 4-FBA          | 200                        | (-)                      | 0.0314 g         | 3.60               |
|                   | TPA            | 200                        | (-)                      | 0.0417 g         | 3.60               |
|                   | Propanoic acid | 200                        | (-)                      | 0.08 mL          | 3.60               |
|                   | Acetic acid    | 200                        | (-)                      | 0.08 mL          | 3.60               |
|                   | Benzoic acid   | 200                        | (-)                      | 0.0736 g         | 3.60               |

18

19 **Table S3.** Zeolite properties as supplied by *Zeolyst International*.

|           | $\text{SiO}_2/\text{Al}_2\text{O}_3$ | Pore size, Å | Surface area, $\text{m}^2/\text{g}$ |
|-----------|--------------------------------------|--------------|-------------------------------------|
| HZSM-5    | 50                                   | 5            | 425                                 |
| H $\beta$ | 25                                   | 5-7          | 680                                 |
| HY        | 5.1                                  | 12           | 925                                 |

20

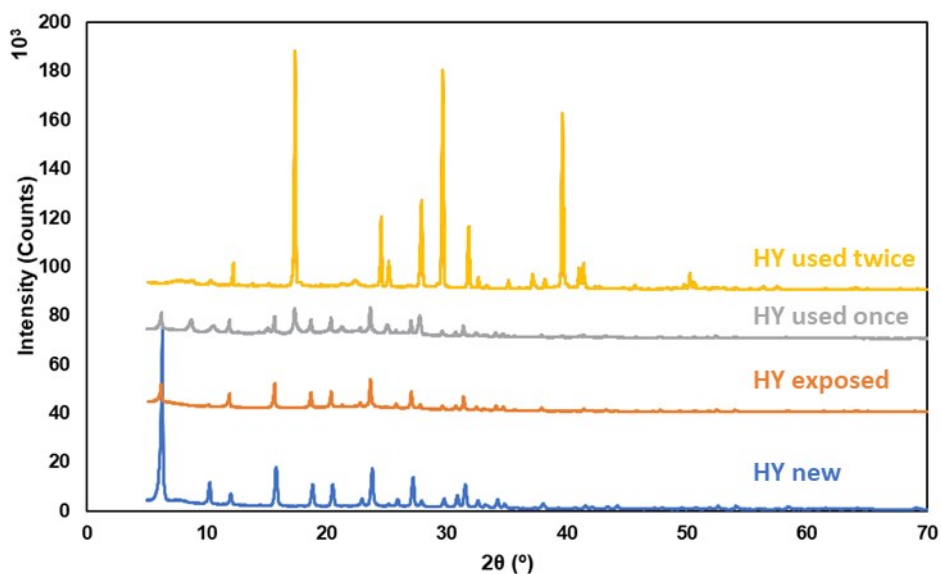

21

22 **Figure S2.** XRD patterns for HY zeolite, fresh after calcination (HY new), after hydrothermal  
 23 exposure at 270 °C for 30 min (HY exposed), after one use for PET hydrolysis at 270 °C for 30 min  
 24 (HY used once), and after two uses during PET hydrolysis at 270 °C for 30 min without  
 25 recalcination (HY used twice).

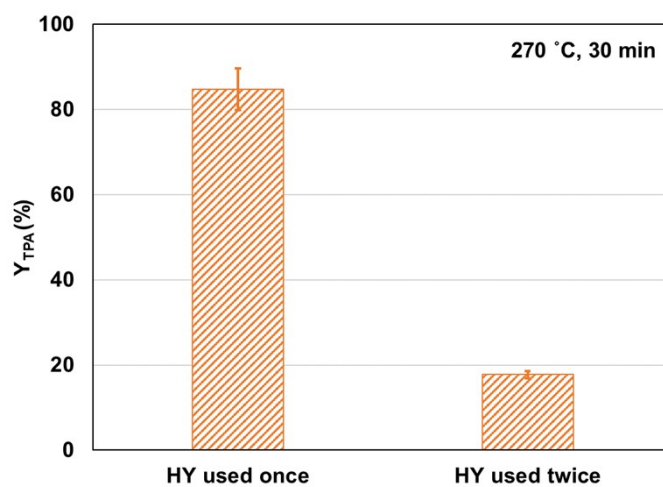

26

27 **Figure S3.** TPA yield after PET hydrolysis with HY in its first use (HY used once) and second use  
 28 (HY used twice).

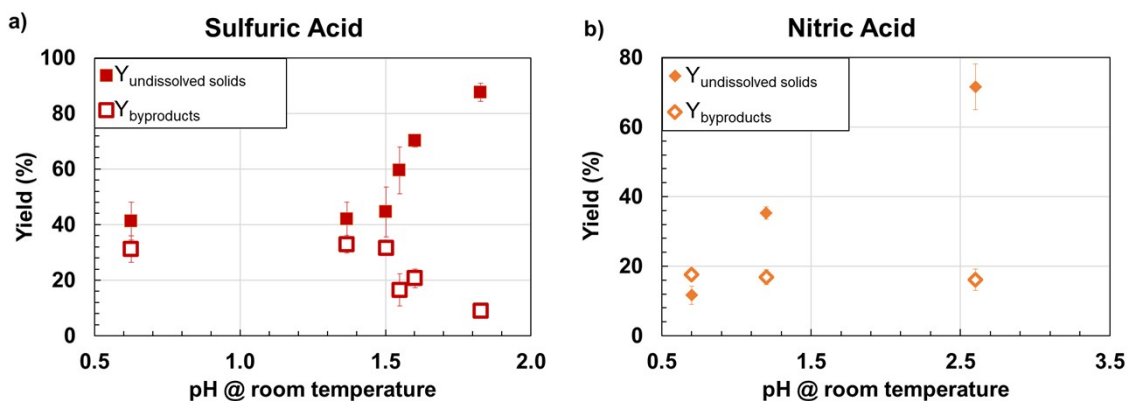

29

30 **Figure S4.** Effect of pH on yields of undissolved solids and byproducts for PET hydrolysis (200 °C,  
 31 2 h, 1/10 mass ratio PET/water) with a) sulfuric acid and b) nitric acid.

32

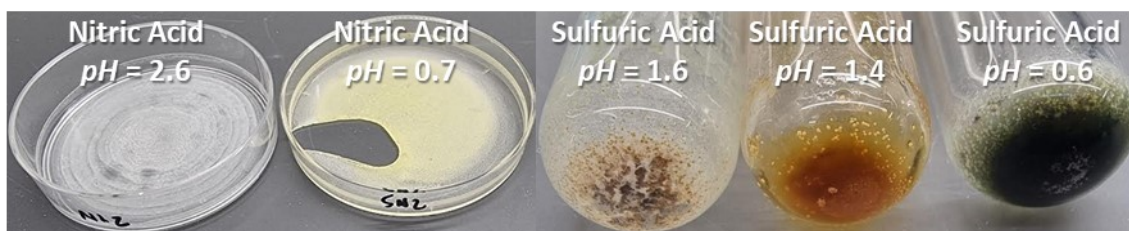

33

34 **Figure S5.** Dissolved solids from hydrolysis of PET. From left to right: Nitric acid at  $pH = 2.6$  and  
 35  $0.7$ , sulfuric acid at  $pH = 1.55$ ,  $1.4$ , and  $0.6$  (all  $pH$  values were measured at room temperature).

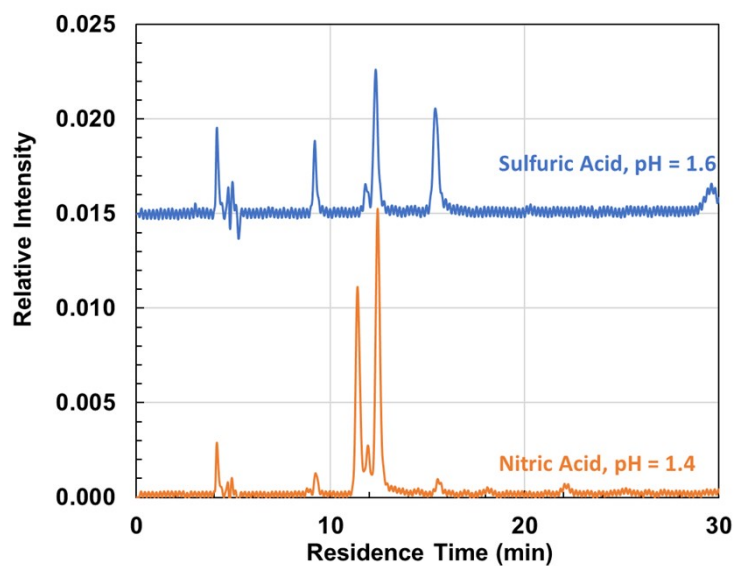

36

37 **Figure S6.** HPLC chromatograms of dissolved solids from hydrolysis of PET with sulfuric acid at  
 38  $pH = 1.6$ , and nitric acid at  $pH = 1.4$  at 200 °C for 2 h.

39

40

41 **Table S4.** Number- and weight-average molecular weights ( $M_n$ ,  $M_w$ ) and degree of  
 42 polymerization ( $DP$ ) of undissolved solids from PET hydrolysis experiments at 200 °C for 2 h as  
 43 determined by MALDI-ToF MS analysis. Bottle-grade PET has  $M_n$  of 24,000-36,000 g/mol.<sup>1</sup>

| Catalyst             | $pH$ | $M_n$ PET (g/mol) | $M_w$ PET (g/mol) | $DP$ |
|----------------------|------|-------------------|-------------------|------|
| Acetic acid          | 2.5  | 1645              | 1756              | 8.6  |
|                      | 2.6  | 1373              | 1434              | 7.1  |
|                      | 2.8  | (-)               | (-)               | (-)  |
| Benzoic acid         | (-)  | 1194              | 1227              | 6.2  |
| IL                   | 1.4  | 1568              | 1670              | 8.2  |
|                      | 1.5  | 1437              | 1500              | 7.5  |
|                      | 1.6  | 1562              | 1652              | 8.1  |
|                      | 2.1  | 1372              | 1454              | 7.1  |
|                      | 2.7  | 1529              | 1621              | 8    |
|                      | 2.9  | 1313              | 1331              | 6.8  |
| IL-SO <sub>3</sub> H | 2.9  | 1655              | 1775              | 8.6  |
|                      | 2.4  | (-)               | (-)               | (-)  |
|                      | 1.9  | 1596              | 1714              | 8.3  |
|                      | 1.4  | 1592              | 1592              | 8.3  |
| Nitric acid          | 0.7  | 1359              | 1419              | 7.1  |
|                      | 1.4  | 1476              | 1506              | 7.7  |
|                      | 2.0  | 1514              | 1638              | 7.9  |
| Sulfuric acid        | 0.7  | 1508              | 1599              | 7.9  |
|                      | 1.4  | 1624              | 1725              | 8.5  |
|                      | 1.5  | 1547              | 1668              | 8.1  |
|                      | 1.6  | 1686              | 1777              | 8.8  |
|                      | 1.6  | 1639              | 1757              | 8.5  |
|                      | 1.8  | 1295              | 1343              | 6.7  |

44

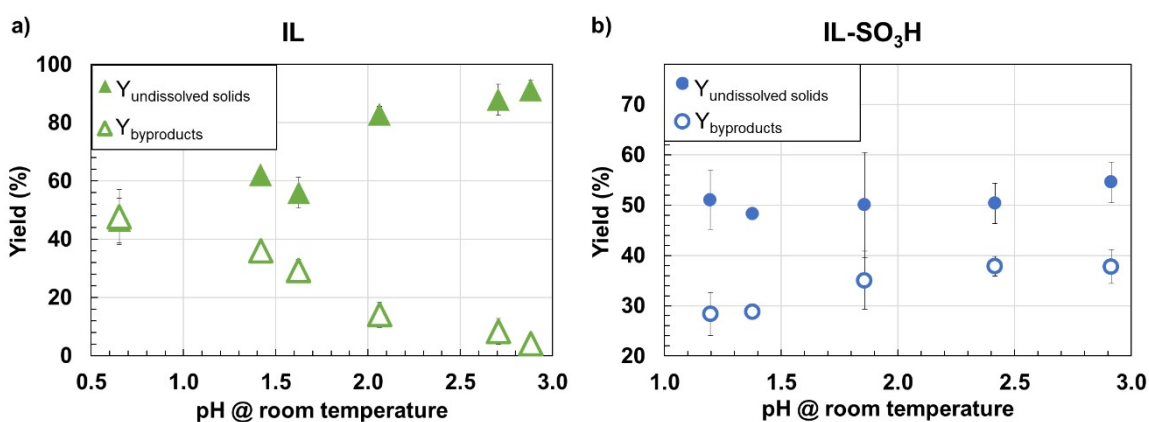

45

46 **Figure S7.** Effect of  $pH$  on yields of undissolved solids and byproducts for PET hydrolysis (200 °C,  
 47 2 h, 1/10 mass ratio PET/water) with a) IL and b) IL-SO<sub>3</sub>H.

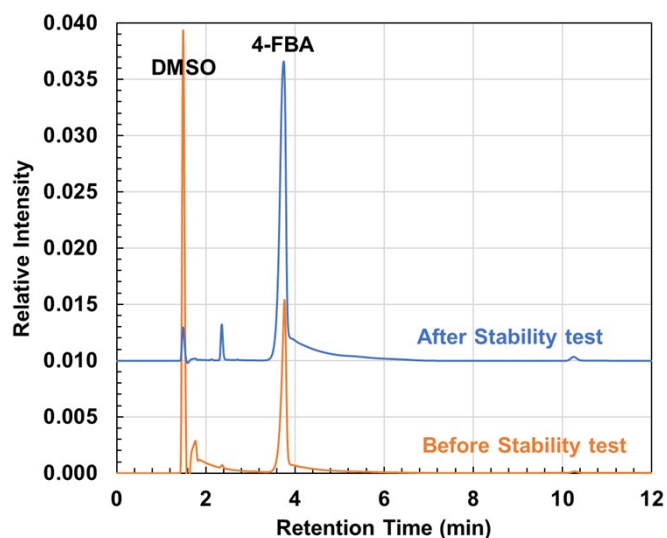

48

49 **Figure S8.** HPLC chromatograms of 4-formylbenzoic acid (4-FBA) before and after hydrothermal  
 50 treatment at 200 °C for 2 h.

51

52 **Table S5.** TPA yield ( $Y_{\text{TPA}}$ ) from PET hydrolysis experiments at 200 °C for 2 h and 1.6 MPa or  $\approx$   
 53 35 MPa.

| Catalyst       | Pressure 1.6 MPa                                |                      | Pressure $\approx$ 35 MPa                       |                      |
|----------------|-------------------------------------------------|----------------------|-------------------------------------------------|----------------------|
|                | $\text{mol}_{\text{cat}}/\text{g}_{\text{PET}}$ | $Y_{\text{TPA}}$ (%) | $\text{mol}_{\text{cat}}/\text{g}_{\text{PET}}$ | $Y_{\text{TPA}}$ (%) |
| 4-FBA          | 0.0010                                          | 15 $\pm$ 8           | 0.0011                                          | 11 $\pm$ 2           |
| TPA            | 0.0012                                          | 17 $\pm$ 2           | 0.0012                                          | 20 $\pm$ 9           |
| Propanoic acid | 0.0052                                          | 4 $\pm$ 3            | 0.0053                                          | 4 $\pm$ 2            |
| Acetic acid    | 0.0051                                          | 16 $\pm$ 5           | 0.0067                                          | 26 $\pm$ 4           |
| Benzoic acid   | 0.0016                                          | 32 $\pm$ 2           | 0.0012                                          | 35 $\pm$<br>10       |

54

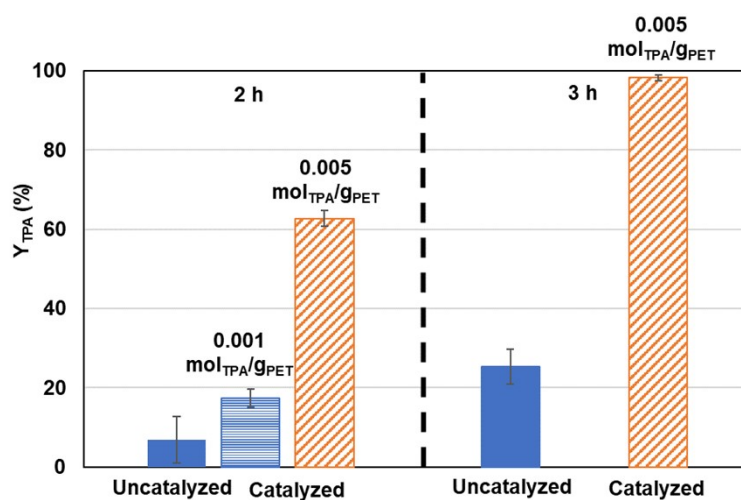

55



56 **Figure S9.** Effect of TPA loading on PET hydrolysis (200 °C, 1/10 mass ratio PET/Water).

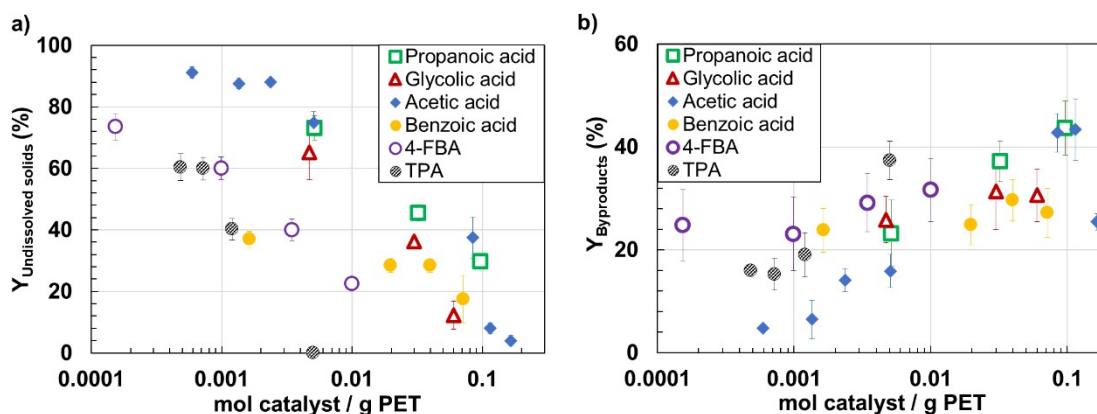

57

58 **Figure S10.** Effect of carboxylic acid loading on yields of a) undissolved solids and b) byproducts  
59 from PET hydrolysis (200 °C, 2 h, 1/10 mass ratio PET/water).

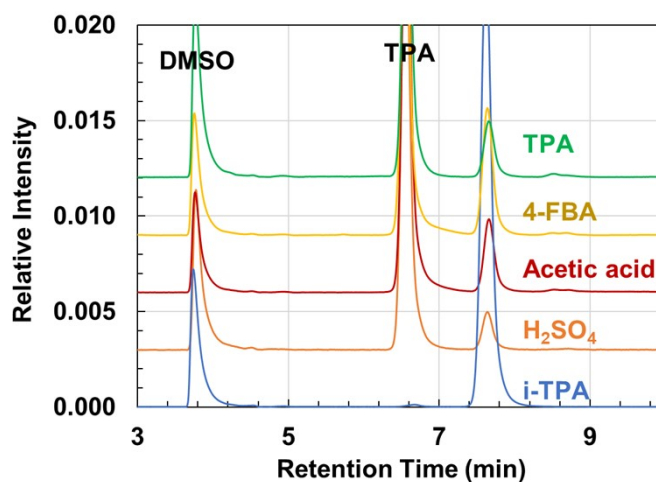

60

61 **Figure S11.** HPLC chromatograms of DMSO-soluble products from PET hydrolysis experiments  
62 (200 °C, 2 h, 1/10 mass ratio PET/water) with terephthalic acid, 4-formyl benzoic acid, acetic  
63 acid, or sulfuric acid and HPLC chromatogram of a standard solution of isophthalic acid. Apart  
64 from the solvent and TPA peak (observed at 6.6 min), all samples showed an additional peak at  
65 7.6 min, and some exhibited a peak at 8.1 min. The peak around 7.6 min was most likely i-TPA.  
66 Commercial bottle-grade PET contains 1.5% isophthalic acid (i-TPA) as a comonomer. Although  
67 mono(2-hydroxyethyl) terephthalic acid (MHET) is also a potential byproduct,<sup>2</sup> it eluted at 7.7  
68 min, and this peak was not observed in the samples.

69

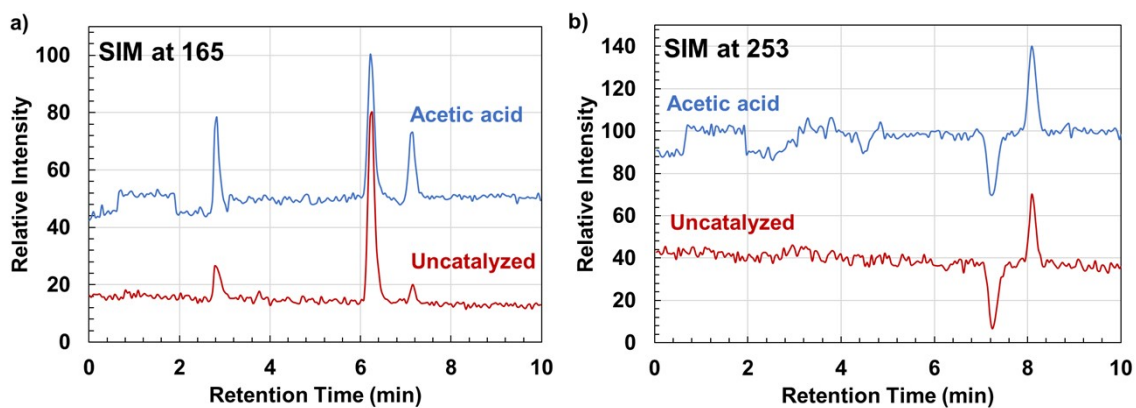

70

71 **Figure S12.** LC-MS selective ion chromatograms for the aqueous-phase products from PET  
 72 hydrolysis without catalyst and with acetic acid (200 °C, 2 h, 1/10 mass ratio PET/water. a) SIM  
 73 at 165 m/z confirms the identities of TPA and isophthalic acid (i-TPA) with retention times of 6.6  
 74 min and 7.6 min, respectively, and b) SIM at 253 m/z indicates the potential presence of bis(2-  
 75 hydroxyethyl) terephthalate, a byproduct arising from the esterification of TPA with ethylene  
 76 glycol.

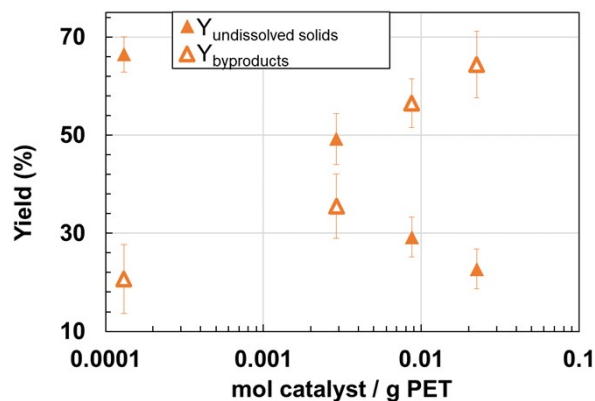

77

78 **Figure S13.** Effect of stearic acid loading on yields of undissolved solids and byproducts from PET  
 79 hydrolysis (200 °C, 2 h, 1/10 mass ratio PET/water).

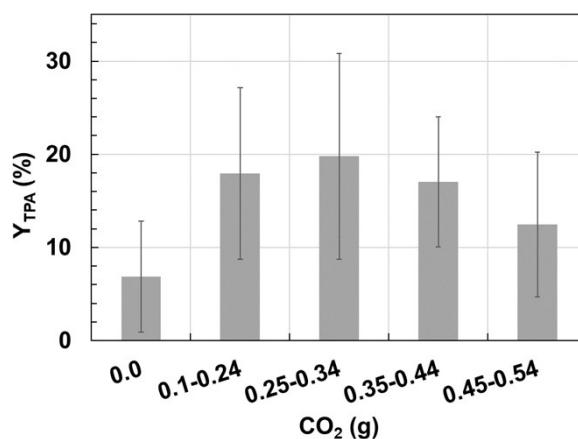

80

81 **Figure S14.** Effect of CO<sub>2</sub> loading on average TPA yield from PET hydrolysis (200 °C, 2 h, 1/10  
 82 mass ratio PET/water). Thermodynamic calculations<sup>3-5</sup> indicate the pH changed from about 3.7  
 83 to 3.3 for 0.1 to 0.54 g CO<sub>2</sub> added. Without CO<sub>2</sub> the pH is 5.4 at 200 °C.

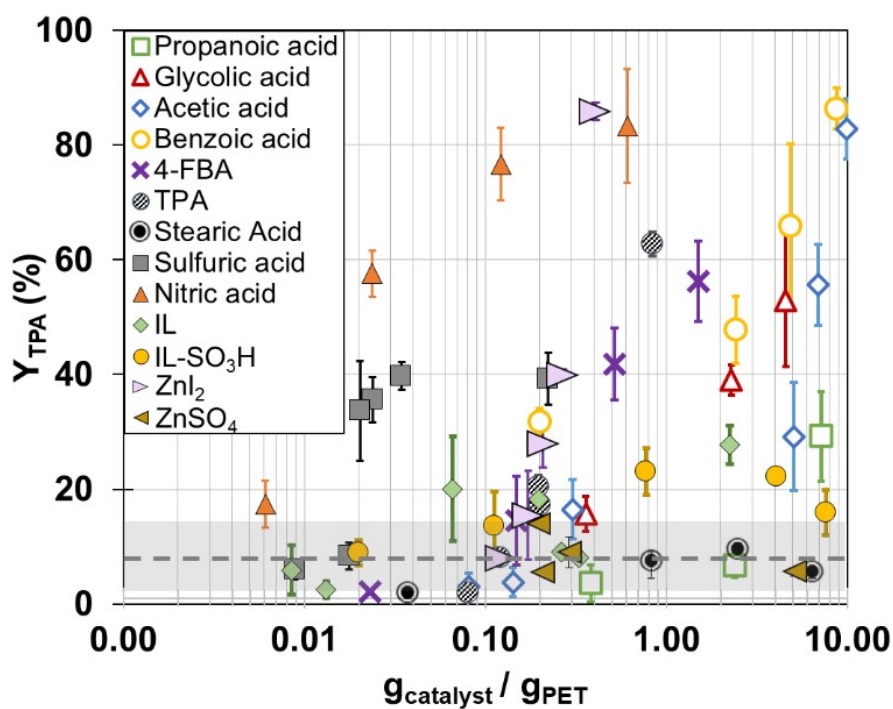

84

85 **Figure S15.** Influence of acid catalysts loading on the TPA yield from PET hydrolysis (200 °C, 2 h,  
 86 1/10 mass ratio PET/water). The dashed line represents the TPA yield average without catalyst,  
 87 and the shaded area the standard deviation.

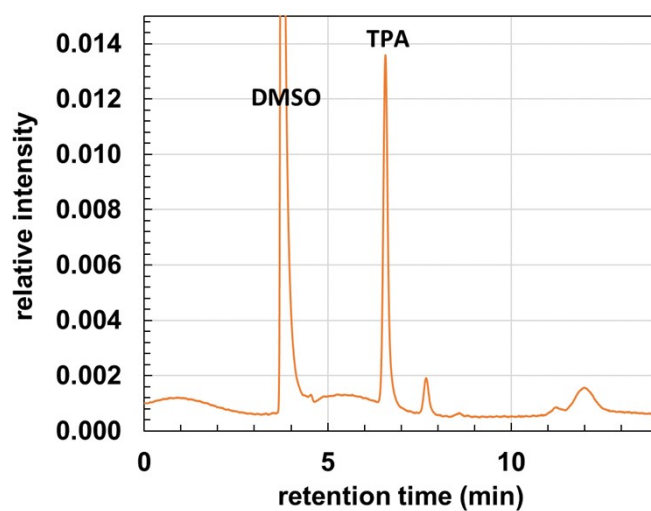

88

89 **Figure S16.** HPLC chromatogram of DMSO-solubles from PET acetolysis at 0.8  $g_{PET}/g_{acetic\ acid}$  (200  
 90 °C, 2 h) shows peaks in addition to TPA. These are byproducts.

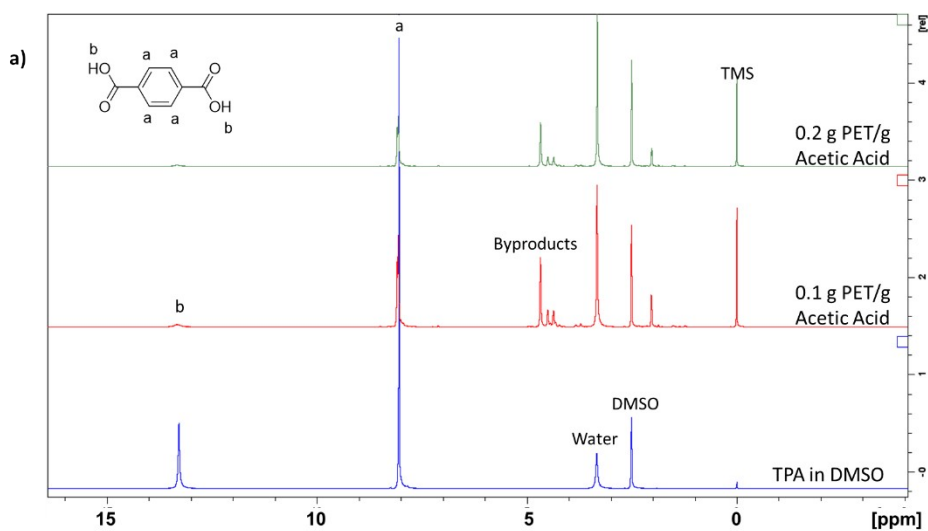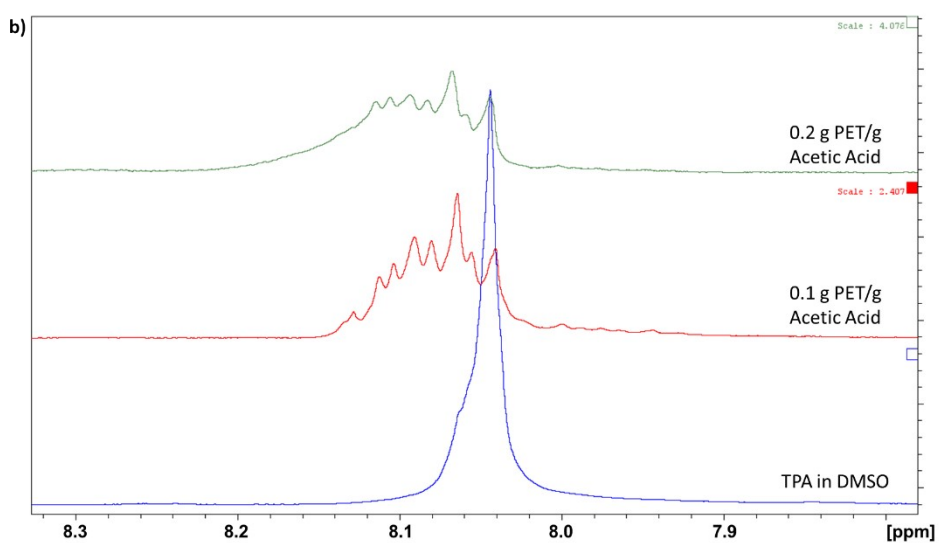

93 **Figure S17.**  $^1\text{H}$  NMR analysis of DMSO-solubles from PET acetolysis (200 °C, 2 h, 0.2 g PET). a) full  
 94 spectrum, and b) expanded view of aromatic proton region. Both panels show peaks arising from  
 95 products other than TPA (*i.e.*, byproducts).

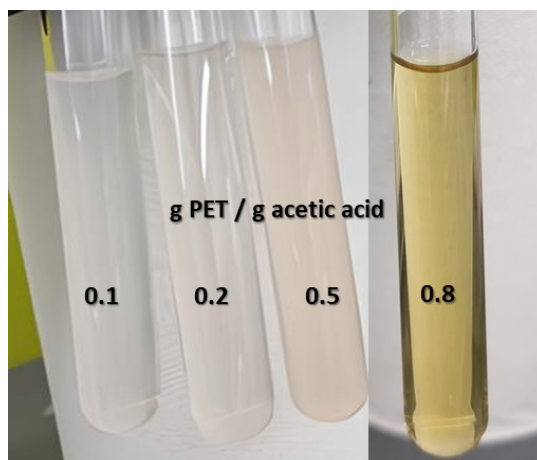

97 **Figure S18.** Dissolved solids in DMSO from PET acidolysis. From left to right: g PET / g acetic acid  
 98 = 0.1, 0.2, 0.5, and 0.8.

99 **References**

- 100 1 J. Scheirs and T. E. Long, *Modern Polyesters: Chemistry and Technology of Polyesters and*  
101 *Copolyesters*, John Wiley & Sons, Ltd, 2003.
- 102 2 H. P. Austin, M. D. Allen, B. S. Donohoe, N. A. Rorrer, F. L. Kearns, R. L. Silveira, B. C.  
103 Pollard, G. Dominick, R. Duman, K. El Omari, V. Mykhaylyk, A. Wagner, W. E. Michener,  
104 A. Amore, M. S. Skaf, M. F. Crowley, A. W. Thorne, C. W. Johnson, H. Lee Woodcock, J. E.  
105 McGeehan and G. T. Beckham, *Proc Natl Acad Sci U S A*, 2018, **115**, E4350–E4357.
- 106 3 S. E. Hunter and P. E. Savage, *Ind. Eng. Chem. Res*, 2003, **42**, 290–294.
- 107 4 S. E. Hunter and P. E. Savage, *Chem Eng Sci*, 2004, **59**, 4903–4909.
- 108 5 S. E. Hunter and P. E. Savage, *AIChE Journal*, 2008, **54**, 516–528.
- 109
